# Supplementary material for: A naphthalimide-based azo colorimetric and ratiometric probe: synthesis and its application in rapid detection of cyanide anions
Source: Royal Society of Chemistry journal article supplement (doi:10.1039/c3ay41931b), 2014-01-01
Supplement: c3ay41931b1.pdf [file c3ay41931b1.pdf]

## Electronic Supplementary Information

### A naphthalimide-based azo colorimetric and ratiometric probe: synthesis and its application for rapid detection of cyanide anion

**Yuanqiang Hao<sup>a</sup>, Wansong Chen<sup>a</sup>, Liqiang Wang<sup>a</sup>, Binbin Zhou<sup>a, b</sup>, Qiguang Zang<sup>a</sup>,  
Song Chen<sup>a</sup> and You-Nian Liu<sup>a, c, \*</sup>**

<sup>a</sup>College of Chemistry and Chemical Engineering, Central South University, Changsha, Hunan, PR China. Fax: +86-731-8887-9616; Tel: +86-731-8883-6964; E-mail: liuyunian@csu.edu.cn (Y.-N. Liu).

<sup>b</sup>Hunan Institute of Food Quality Supervision Inspection and Research, Changsha, Hunan 410111, PR China.

<sup>c</sup>Key Laboratory of Resources Chemistry of Nonferrous Metals (Central South University), Ministry of Education, Changsha, Hunan 410083, PR China.

## Analytical methods

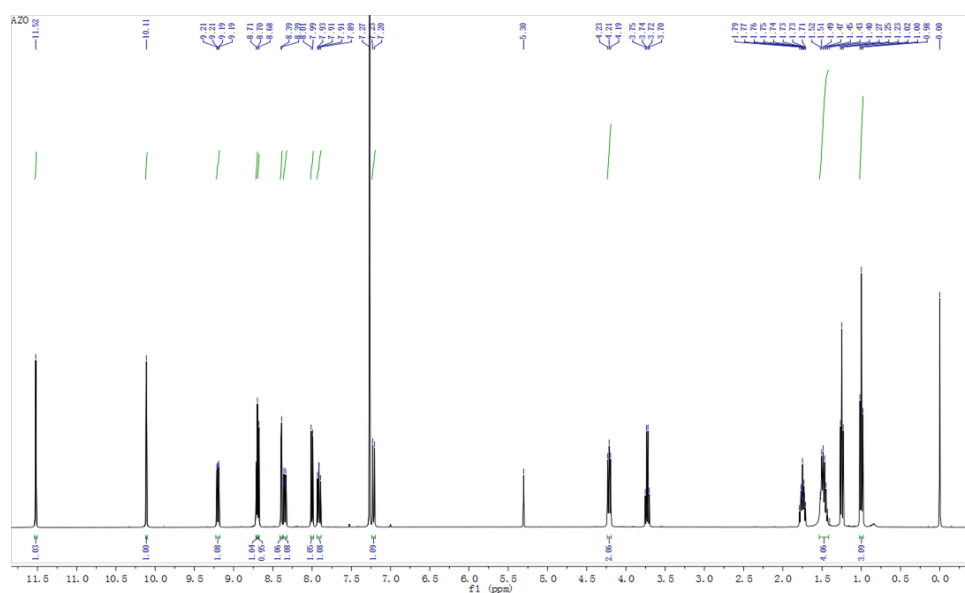

**Fig. S1.** <sup>1</sup>H NMR chemical shifts of probe 1.

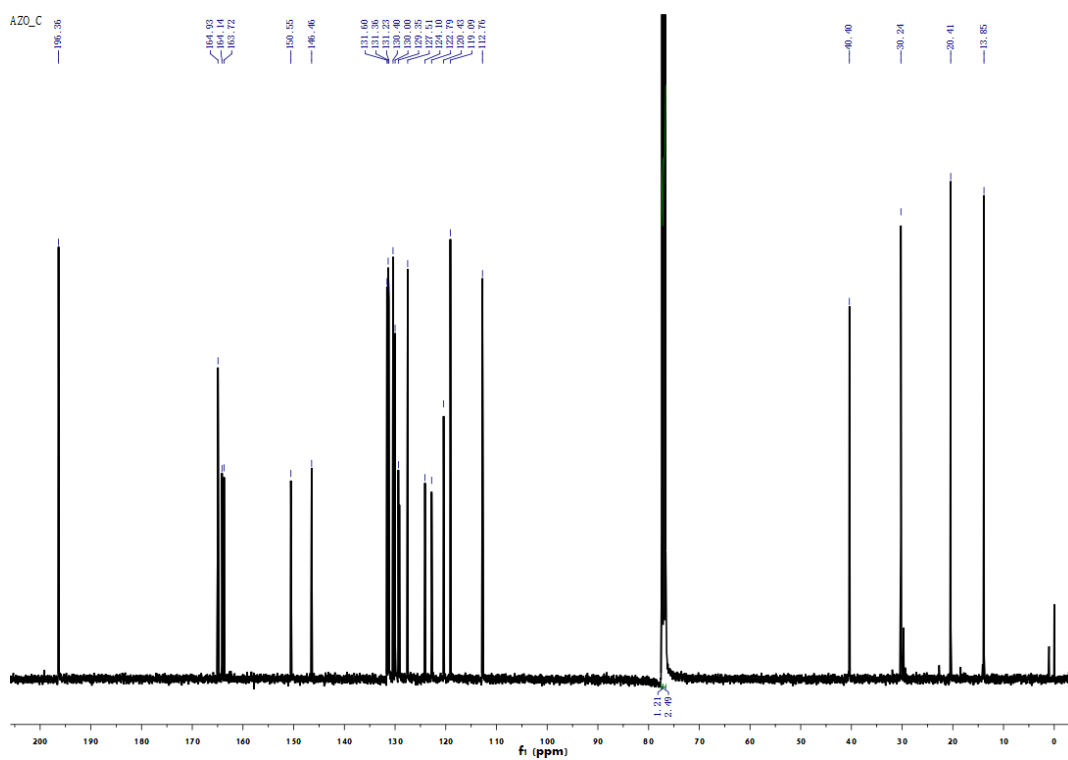

**Fig. S2.** <sup>13</sup>C NMR chemical shifts of probe 1.

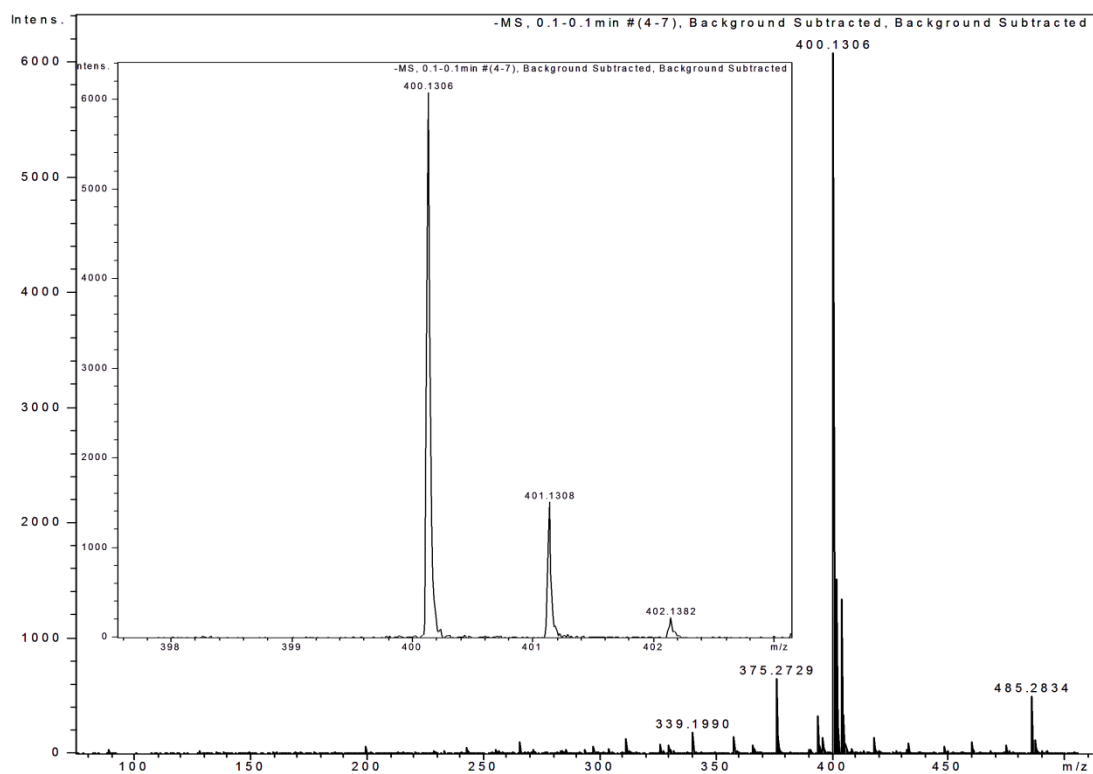

Fig. S3 High resolution mass spectrum (HRMS) of the probe 1.

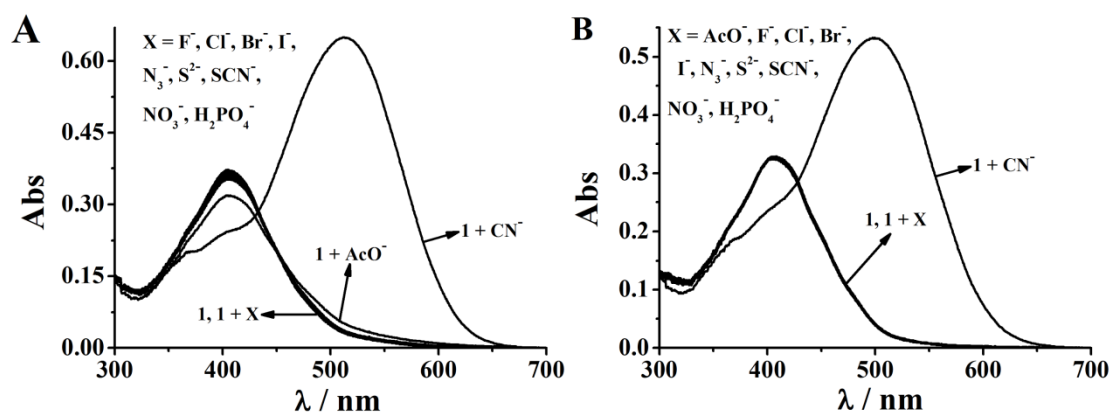

Fig. S4. UV-vis spectra of **1** (25  $\mu\text{M}$ ) on addition of various anions (50  $\mu\text{M}$ ) in different  $\text{H}_2\text{O}/\text{DMSO}$  (v/v) mixed solvents. (A) 1/1  $\text{H}_2\text{O}/\text{DMSO}$ ; (B) 7/3  $\text{H}_2\text{O}/\text{DMSO}$ .

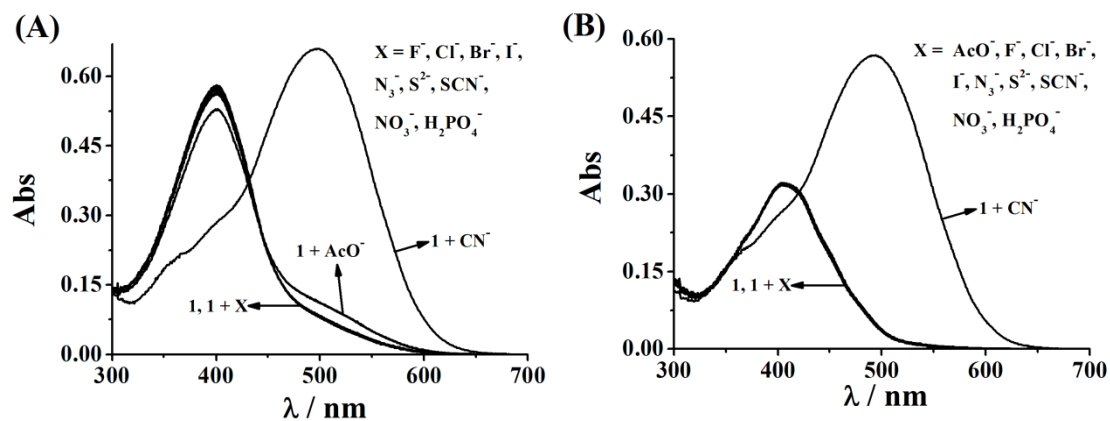

**Fig. S5.** UV-vis spectra of **1** (25  $\mu\text{M}$ ) on addition of various anions (50  $\mu\text{M}$ ) in different H<sub>2</sub>O/DMSO (v/v) mixed solvents. (A) 1/1 H<sub>2</sub>O/MeCN; (B) 7/3 H<sub>2</sub>O/ MeCN.

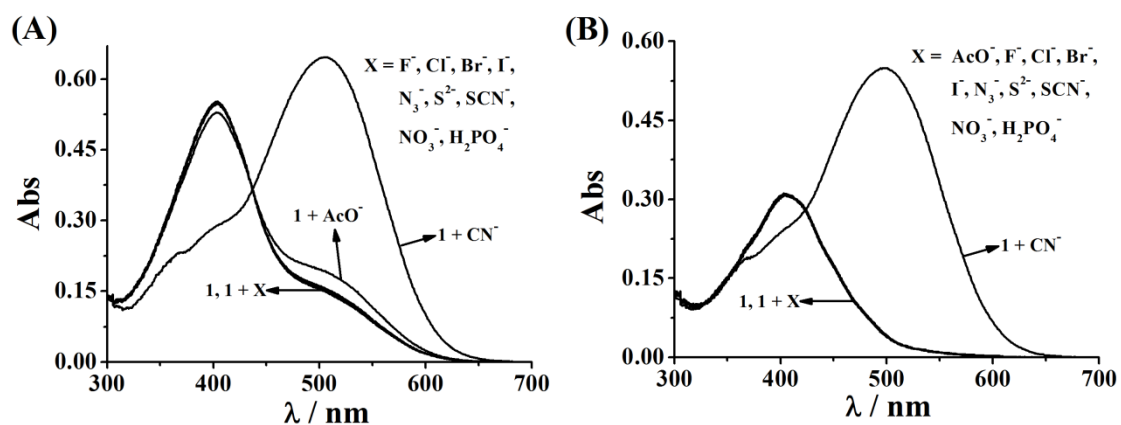

**Fig. S6.** UV-vis spectra of **1** (25  $\mu\text{M}$ ) on addition of various anions (50  $\mu\text{M}$ ) in different H<sub>2</sub>O/DMSO (v/v) mixed solvents. (A) 1/1 H<sub>2</sub>O/EtOH; (B) 7/3 H<sub>2</sub>O/ EtOH.
